# Supplementary material
Source: PubMed Central journal article supplement (PMC2655537)
Supplement: supp_191_7_2266__1.pdf [file supp_191_7_2266__1.pdf]

1 TABLE 1: FliA-dependent promoters used to generate a weight matrix.

| 2  | Specie                        | Gene/Promoter     | Sequence                     | References <sup>#</sup> |
|----|-------------------------------|-------------------|------------------------------|-------------------------|
| 3  | <i>Treponema phagedenis</i>   | <i>Tap 1</i>      | TCAACAAAAGTTTTAACATGCCGAAAT  | 8                       |
| 4  | <i>Treponema pallidum</i>     | <i>Tap 1</i>      | AAGACGTGCTGCGCAGTGCGCCGAGAA  | 8                       |
| 5  | <i>Treponema phagedenis</i>   | <i>FlaB2</i>      | TTAAGTGTTTTTCCGCCATCCGATAC   | 8                       |
| 6  | <i>Treponema pallidum</i>     | <i>FlaB2</i>      | TCAAGTGCACCCGGCGTATTCCGATAC  | 8                       |
| 7  | <i>Treponema pallidum</i>     | <i>FlaB1</i>      | TCAAGTCCTTTTTCCGTTTTTCCGATTT | 8                       |
| 8  | <i>Escherichia coli</i>       | <i>tar</i>        | TAAAGTTTTCCCCCTCCTTGCCGATAA  | 1                       |
| 9  | <i>Escherichia coli</i>       | <i>flaA1</i>      | AAGACGCAGGATAATTAGCCGATAA    | 1                       |
| 10 | <i>Escherichia coli</i>       | <i>tsr</i>        | TAAAGTTTTTCTTTCCAGGCCGAAAA   | 1                       |
| 11 | <i>Escherichia coli</i>       | <i>trg</i>        | TAAGTAATTACCGTCAAGTGCCGATGA  | 4                       |
| 12 | <i>Escherichia coli</i>       | <i>hag</i>        | TAAAGTTGTTTTACGACAGACGATAA   | 4                       |
| 13 | <i>Escherichia coli</i>       | <i>rfs</i>        | TAAACTTTGCGCAATTCAGACCGATAA  | 4                       |
| 14 | <i>Bacillus subtilis</i>      | P <sub>28-1</sub> | TAAATGATTCTGTTTTTATGCCGATAT  | 6                       |
| 15 | <i>Bacillus subtilis</i>      | P <sub>28-2</sub> | TAAAGTTCCGGGCACCAAAACCGATAT  | 6                       |
| 16 | <i>Bacillus subtilis</i>      | MG102             | TAAATGATTCTGTTTTTATGCCGATAT  | 3                       |
| 17 | <i>Bacillus subtilis</i>      | MG 201            | TAAAGTTCCGGGCACCAAAACCGATAT  | 3                       |
| 18 | <i>Salmonella typhimurium</i> | <i>tar</i>        | TAAAGTTATCGCCGCAGGTGCCGATAA  | 5                       |
| 19 | <i>Salmonella typhimurium</i> | <i>H2</i>         | TAAAGTTTATGCCTCAACTGTTCGATAA | 5                       |
| 20 | <i>Salmonella typhimurium</i> | <i>H1</i>         | TAAAGTTCGAAATTCAGGTGCCGATAC  | 5                       |
| 21 | <i>Salmonella typhimurium</i> | <i>rfs(S)</i>     | TAAACTTTGCCTCCAGATTGCCGATAA  | 5                       |
| 22 | <i>Salmonella typhimurium</i> | <i>fljB</i>       | TAAAGTTTATGCCTCAAGTGTTCGATAA | 7                       |
| 23 | <i>Proteus mirabilis</i>      | <i>flaD</i>       | TAAACTTTTCGCCAATTCCTCCGATAA  | 2                       |
| 24 | <i>Proteus mirabilis</i>      | <i>flaA</i>       | TAAAGGTTGTATCTGGGGTGCCGATAA  | 2                       |
| 25 | <i>Proteus mirabilis</i>      | <i>flaB</i>       | TAAATACCTTCGATTTAATGACGATAG  | 2                       |
| 26 | <i>Campylobacter coli</i>     | <i>flaA</i>       | TAAACTATTTTTCTTTTAAACGATAT   | 5                       |

27 <sup>#</sup>References

- 28 1. **Arnosti, D. N., and M. J. Chamberlin.** 1989. Secondary sigma factor controls  
 29 transcription of flagellar and chemotaxis genes in *Escherichia coli*. Proc. Natl.  
 30 Acad. Sci. USA. **86**:830-834.
- 31 2. **Belas, R.** 1994. Expression of multiple flagellin-encoding genes of *Proteus*  
 32 *mirabilis*. J. Bacteriol. **176**:7169-7181.
- 33 3. **Gilman, M. Z., J. L. Wiggs, and M. J. Chamberlin.** 1981. Nucleotide sequences  
 34 of two *Bacillus subtilis* promoters used by *Bacillus subtilis* sigma-28 RNA  
 35 polymerase. Nucleic Acids Res. **9**:5991-6000.
- 36 4. **Helmann, J. D., and M. J. Chamberlin.** 1987. DNA sequence analysis suggests  
 37 that expression of flagellar and chemotaxis genes in *Escherichia coli* and  
 38 *Salmonella typhimurium* is controlled by an alternative sigma factor. Proc. Natl.

- 39 Acad. Sci. USA. **84**:6422-6424.
- 40 5. **Helmann, J. D.** 1991. Alternative sigma factors and the regulation of flagellar  
41 gene expression. *Mol. Microbiol.* **5**:2875-2882.
- 42 6. **Mirel, D. B., and M. J. Chamberlin.** 1989. The *Bacillus subtilis* flagellin gene  
43 (*hag*) is transcribed by the sigma 28 form of RNA polymerase. *J. Bacteriol.*  
44 **171**:3095-3101.
- 45 7. **Osuna, R, D. Lienau, K. T. Hughes, and R. C. Johnson.** 1995. Sequence,  
46 regulation, and functions of *fis* in *Salmonella typhimurium*. *J. Bacteriol.*  
47 **177**:2021-2032.
- 48 8. **Stamm, L. V., and H. L. Bergen.** 1999. Molecular characterization of a flagellar  
49 (*fla*) operon in the oral spirochete *Treponema denticola* ATCC 35405. *FEMS*  
50 *Microbiol. Lett.* **179**:31-36.

51 TABLE 2: A weight matrix of FliA-dependent promoters.

---

|    |   |    |    |    |    |    |    |    |    |    |    |   |    |    |    |    |   |   |    |    |    |    |    |    |    |    |    |    |
|----|---|----|----|----|----|----|----|----|----|----|----|---|----|----|----|----|---|---|----|----|----|----|----|----|----|----|----|----|
| 52 | A | 2  | 20 | 24 | 23 | 0  | 4  | 5  | 2  | 4  | 3  | 2 | 2  | 4  | 6  | 6  | 8 | 8 | 10 | 7  | 4  | 3  | 0  | 0  | 25 | 3  | 23 | 14 |
| 53 | C | 0  | 4  | 0  | 1  | 7  | 1  | 3  | 7  | 6  | 8  | 6 | 10 | 11 | 6  | 10 | 4 | 5 | 4  | 1  | 0  | 20 | 25 | 0  | 0  | 0  | 0  | 3  |
| 54 | G | 0  | 0  | 1  | 1  | 14 | 5  | 3  | 2  | 5  | 3  | 9 | 6  | 3  | 2  | 2  | 6 | 3 | 6  | 2  | 17 | 0  | 0  | 25 | 0  | 1  | 1  | 1  |
| 55 | T | 23 | 1  | 0  | 0  | 4  | 15 | 14 | 14 | 10 | 11 | 8 | 7  | 7  | 11 | 7  | 7 | 9 | 5  | 15 | 4  | 2  | 0  | 0  | 0  | 21 | 1  | 7  |

---

56

57 TABLE 3: Putative FliA-dependent promoters in *Xcc* str. ATCC33913.

| 58 | Locus     | Seq_id  | Gene name                    | Sequence (5'-3')            | Weight |
|----|-----------|---------|------------------------------|-----------------------------|--------|
| 59 | NP_635718 | XCC0323 | hypothetical protein         | TCAAGCGTAAGCGCCCAAGTCCGATAA | 9.8    |
| 60 | NP_635745 | XCC0350 | HD-GYP domain protein        | CAAAGAATCCTGCGCGGCTGCCGATAA | 11.1   |
| 61 | NP_635801 | XCC0407 | GGDEF protein                | TCAAGGGCCCTGCACCAACGCCGATAA | 12.4   |
| 62 | NP_636724 | XCC1350 | hypothetical protein         | TACAGTCGGTGACCCCTGTGCCGATAA | 11.2   |
| 63 | NP_636781 | XCC1408 | hypothetical protein         | TAAAGTTCGCCGCGCCGACGCCGATAG | 11.3   |
| 64 | NP_636816 | XCC1443 | GGDEF protein                | TCAACTTTCGCACGCGTCGGCCGATAC | 10.6   |
| 65 | NP_636947 | XCC1576 | hypothetical protein         | TCAAGTCTGCCGATTCTGGCCGACAA  | 8.7    |
| 66 | NP_637096 | XCC1727 | chemotaxis protein McpA      | TCAAGGATTCGATCGGTGAGCCGCTAA | 9.6    |
| 67 | NP_637143 | XCC1777 | GGDEF protein                | TCAAGTCGCCGCGCTCGAGGCCGATAT | 9.9    |
| 68 | NP_637235 | XCC1870 | hypothetical protein         | TCAAGTTGAACGGCAGCTAGCCGATAG | 10.2   |
| 69 | NP_637236 | XCC1871 | chemotaxis protein CheW      | TAAAGTTGCCGCCGACGGCCGCGATGT | 10.2   |
| 70 | NP_637248 | XCC1883 | putative chemotaxis protein  | TCAAGCACACCCTCTGCGGCCGATAC  | 8.2    |
| 71 | NP_637256 | XCC1891 | flagellar motor protein MotC | TCAAGTCCGCCCGCCTGGGCCGATAC  | 8.6    |
| 72 | NP_637305 | XCC1940 | flagellar protein FliD       | TCAAGTCCTCCCGGATGCGGCCGATAC | 8.8    |
| 73 | NP_637306 | XCC1941 | flagellin FliC               | TAAAGATCTGGCAGTTGCTGCCGAATA | 11.3   |
| 74 | NP_637320 | XCC1955 | anti-sigma factor FlgM       | TAAAGTTTTTTTTCTGGCTGCCGTTAT | 16.3   |
| 75 | NP_637669 | XCC2315 | chemotaxis protein mcpA      | TCAAGCACGTTTTGCTTGCGCCGATAG | 9.1    |
| 76 | NP_638865 | XCC3519 | GGDEF family protein         | TCAAGTTCGCCCCAGACGCCGATGA   | 11.4   |
| 77 | NP_638868 | XCC3522 | chemotaxis protein Tsr       | TAAATCGCCGCGTGAAACAGCCGATAT | 10.6   |
| 78 | NP_638892 | XCC3546 | GGDEF protein                | TCAAGACCCTGGCCACCCGGCCGATAA | 11     |
| 79 | NP_638999 | XCC3653 | flagellar motor protein MotA | TCAAGAATCCGCCCCCGGCCGAAAC   | 8.2    |
